# Supplementary material for: Specificity in Toll-like receptor signalling through distinct effector functions of TRAF3 and TRAF6
Source: Springer Nature journal article supplement (doi:10.1038/nature04369), 2005-11-23

# Häcker et al., Supplementary Figure 4

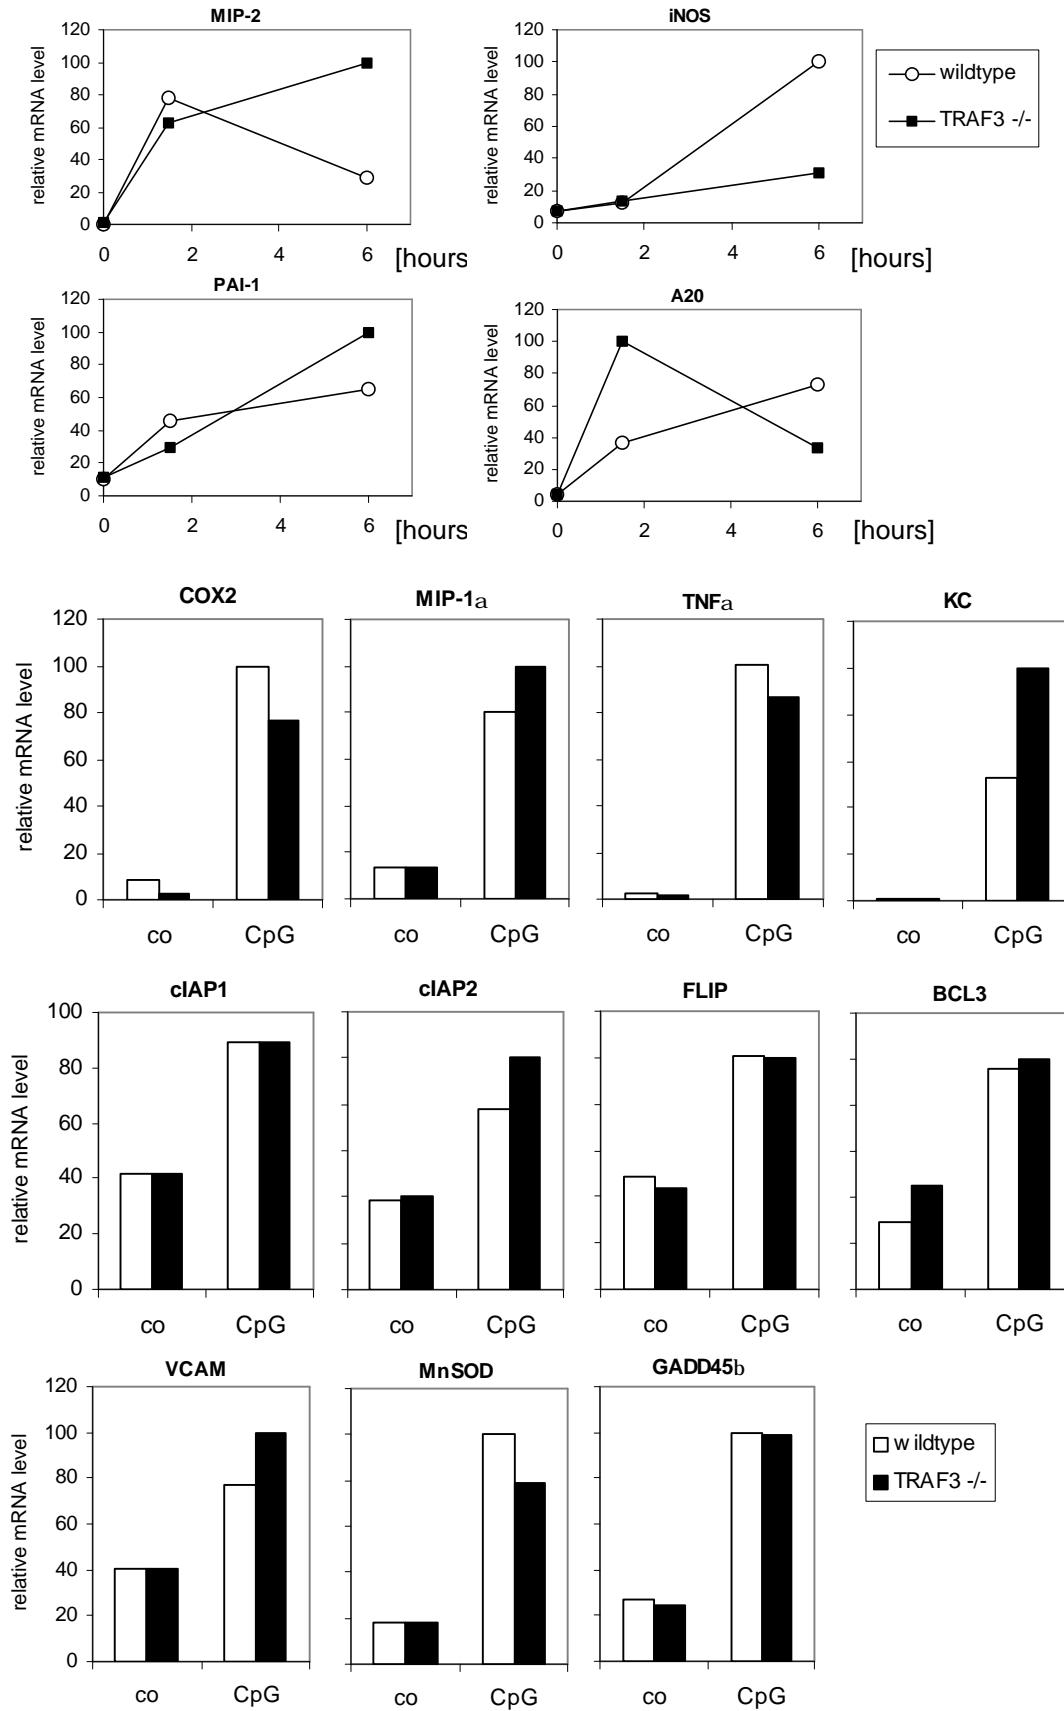

Supplement: 41586_2006_BFnature04369_MOESM4_ESM.pdf [file 41586_2006_BFnature04369_MOESM4_ESM.pdf]
